# Supplementary material for: Genetic sources and diversity of the paddy field carp in the Pearl River basin inferred from two mitochondrial loci
Source: Frontiers journal article supplement (doi:10.3389/fevo.2022.896609), 2022-07-28
Supplement: Table_1.XLSX [file Table_1.XLSX]

## Sheet: Sheet1
Table S1. Basic information of samples
Locality (Codes)	Lat	Long	Sample size	Voucher No.	Genbank nos
					Cytb	Dloop
Congjiang (CJ)	25.3937	108.263	28	CJ1	OM933729	OM934253
				CJ10	OM933730	OM934254
				CJ11	OM933731	OM934255
				CJ12	OM933732	OM934256
				CJ13	OM933733	OM934257
				CJ14	OM933734	OM934258
				CJ15	OM933735	OM934259
				CJ16	OM933736	OM934260
				CJ17	OM933737	OM934261
				CJ18	OM933738	OM934262
				CJ19	OM933739	OM934263
				CJ2	OM933740	OM934264
				CJ20	OM933741	OM934265
				CJ21	OM933742	OM934266
				CJ22	OM933743	OM934267
				CJ23	OM933744	OM934268
				CJ24	OM933745	OM934269
				CJ25	OM933746	OM934270
				CJ26	OM933747	OM934271
				CJ27	OM933748	OM934272
				CJ28	OM933749	OM934273
				CJ3	OM933750	OM934274
				CJ4	OM933751	OM934275
				CJ5	OM933752	OM934276
				CJ6	OM933753	OM934277
				CJ7	OM933754	OM934278
				CJ8	OM933755	OM934279
				CJ9	OM933756	OM934280
Du'an(DA)	23.9313	108.106	20	DA1	OM933757	OM934281
				DA10	OM933758	OM934282
				DA11	OM933759	OM934283
				DA12	OM933760	OM934284
				DA13	OM933761	OM934285
				DA14	OM933762	OM934286
				DA15	OM933763	OM934287
				DA16	OM933764	OM934288
				DA17	OM933765	OM934289
				DA18	OM933766	OM934290
				DA19	OM933767	OM934291
				DA2	OM933768	OM934292
				DA20	OM933769	OM934293
				DA3	OM933770	OM934294
				DA4	OM933771	OM934295
				DA5	OM933772	OM934296
				DA6	OM933773	OM934297
				DA7	OM933774	OM934298
				DA8	OM933775	OM934299
				DA9	OM933776	OM934300
Foshan (FS)	22.938	112.988	39	FS1	OM933777	OM934301
				FS10	OM933778	OM934302
				FS11	OM933779	OM934303
				FS12	OM933780	OM934304
				FS13	OM933781	OM934305
				FS14	OM933782	OM934306
				FS15	OM933783	OM934307
				FS16	OM933784	OM934308
				FS17	OM933785	OM934309
				FS18	OM933786	OM934310
				FS19	OM933787	OM934311
				FS2	OM933788	OM934312
				FS20	OM933789	OM934313
				FS21	OM933790	OM934314
				FS22	OM933791	OM934315
				FS23	OM933792	OM934316
				FS24	OM933793	OM934317
				FS25	OM933794	OM934318
				FS26	OM933795	OM934319
				FS27	OM933796	OM934320
				FS28	OM933797	OM934321
				FS29	OM933798	OM934322
				FS3	OM933799	OM934323
				FS30	OM933800	OM934324
				FS31	OM933801	OM934325
				FS32	OM933802	OM934326
				FS33	OM933803	OM934327
				FS34	OM933804	OM934328
				FS35	OM933805	OM934329
				FS36	OM933806	OM934330
				FS37	OM933807	OM934331
				FS38	OM933808	OM934332
				FS39	OM933809	OM934333
				FS4	OM933810	OM934334
				FS5	OM933811	OM934335
				FS6	OM933812	OM934336
				FS7	OM933813	OM934337
				FS8	OM933814	OM934338
				FS9	OM933815	OM934339
Guiganag (GG)	23.0904	109.603	31	GG1	OM933816	OM934340
				GG10	OM933817	OM934341
				GG11	OM933818	OM934342
				GG12	OM933819	OM934343
				GG13	OM933820	OM934344
				GG14	OM933821	OM934345
				GG15	OM933822	OM934346
				GG16	OM933823	OM934347
				GG17	OM933824	OM934348
				GG18	OM933825	OM934349
				GG19	OM933826	OM934350
				GG2	OM933827	OM934351
				GG20	OM933828	OM934352
				GG21	OM933829	OM934353
				GG22	OM933830	OM934354
				GG23	OM933831	OM934355
				GG24	OM933832	OM934356
				GG25	OM933833	OM934357
				GG26	OM933834	OM934358
				GG27	OM933835	OM934359
				GG28	OM933836	OM934360
				GG29	OM933837	OM934361
				GG3	OM933838	OM934362
				GG30	OM933839	OM934363
				GG31	OM933840	OM934364
				GG4	OM933841	OM934365
				GG5	OM933842	OM934366
				GG6	OM933843	OM934367
				GG7	OM933844	OM934368
				GG8	OM933845	OM934369
				GG9	OM933846	OM934370
Guilin(GL)	25.2477	110.288	18	GL1	OM933847	OM934371
				GL10	OM933848	OM934372
				GL11	OM933849	OM934373
				GL12	OM933850	OM934374
				GL13	OM933851	OM934375
				GL14	OM933852	OM934376
				GL17	OM933853	OM934377
				GL18	OM933854	OM934378
				GL19	OM933855	OM934379
				GL2	OM933856	OM934380
				GL20	OM933857	OM934381
				GL3	OM933858	OM934382
				GL4	OM933859	OM934383
				GL5	OM933860	OM934384
				GL6	OM933861	OM934385
				GL7	OM933862	OM934386
				GL8	OM933863	OM934387
				GL9	OM933864	OM934388
Huanjiang (HJ)	25.3937	108.263	46	HJ1	OM933865	OM934389
				HJ10	OM933866	OM934390
				HJ11	OM933867	OM934391
				HJ12	OM933868	OM934392
				HJ13	OM933869	OM934393
				HJ14	OM933870	OM934394
				HJ15	OM933871	OM934395
				HJ16	OM933872	OM934396
				HJ17	OM933873	OM934397
				HJ18	OM933874	OM934398
				HJ19	OM933875	OM934399
				HJ2	OM933876	OM934400
				HJ20	OM933877	OM934401
				HJ21	OM933878	OM934402
				HJ22	OM933879	OM934403
				HJ23	OM933880	OM934404
				HJ24	OM933881	OM934405
				HJ25	OM933882	OM934406
				HJ26	OM933883	OM934407
				HJ27	OM933884	OM934408
				HJ28	OM933885	OM934409
				HJ29	OM933886	OM934410
				HJ3	OM933887	OM934411
				HJ30	OM933888	OM934412
				HJ31	OM933889	OM934413
				HJ32	OM933890	OM934414
				HJ33	OM933891	OM934415
				HJ34	OM933892	OM934416
				HJ35	OM933893	OM934417
				HJ36	OM933894	OM934418
				HJ37	OM933895	OM934419
				HJ38	OM933896	OM934420
				HJ39	OM933897	OM934421
				HJ4	OM933898	OM934422
				HJ40	OM933899	OM934423
				HJ41	OM933900	OM934424
				HJ42	OM933901	OM934425
				HJ43	OM933902	OM934426
				HJ44	OM933903	OM934427
				HJ45	OM933904	OM934428
				HJ46	OM933905	OM934429
				HJ5	OM933906	OM934430
				HJ6	OM933907	OM934431
				HJ7	OM933908	OM934432
				HJ8	OM933909	OM934433
				HJ9	OM933910	OM934434
Linchuan (LC)	25.4109	110.324	24	LC1	OM933911	OM934435
				LC10	OM933912	OM934436
				LC11	OM933913	OM934437
				LC12	OM933914	OM934438
				LC13	OM933915	OM934439
				LC14	OM933916	OM934440
				LC15	OM933917	OM934441
				LC16	OM933918	OM934442
				LC17	OM933919	OM934443
				LC18	OM933920	OM934444
				LC19	OM933921	OM934445
				LC2	OM933922	OM934446
				LC20	OM933923	OM934447
				LC21	OM933924	OM934448
				LC22	OM933925	OM934449
				LC23	OM933926	OM934450
				LC24	OM933927	OM934451
				LC3	OM933928	OM934452
				LC4	OM933929	OM934453
				LC5	OM933930	OM934454
				LC6	OM933931	OM934455
				LC7	OM933932	OM934456
				LC8	OM933933	OM934457
				LC9	OM933934	OM934458
Liannan (LN)	24.7247	112.289	27	LN1	OM933935	OM934459
				LN10	OM933936	OM934460
				LN11	OM933937	OM934461
				LN12	OM933938	OM934462
				LN13	OM933939	OM934463
				LN14	OM933940	OM934464
				LN15	OM933941	OM934465
				LN16	OM933942	OM934466
				LN17	OM933943	OM934467
				LN19	OM933944	OM934468
				LN2	OM933945	OM934469
				LN20	OM933946	OM934470
				LN21	OM933947	OM934471
				LN22	OM933948	OM934472
				LN23	OM933949	OM934473
				LN24	OM933950	OM934474
				LN25	OM933951	OM934475
				LN26	OM933952	OM934476
				LN27	OM933953	OM934477
				LN28	OM933954	OM934478
				LN29	OM933955	OM934479
				LN3	OM933956	OM934480
				LN4	OM933957	OM934481
				LN5	OM933958	OM934482
				LN6	OM933959	OM934483
				LN7	OM933960	OM934484
				LN8	OM933961	OM934485
Nanning (NN)	23.5306	108.66	31	NN1	OM933962	OM934486
				NN10	OM933963	OM934487
				NN11	OM933964	OM934488
				NN12	OM933965	OM934489
				NN13	OM933966	OM934490
				NN14	OM933967	OM934491
				NN15	OM933968	OM934492
				NN16	OM933969	OM934493
				NN17	OM933970	OM934494
				NN18	OM933971	OM934495
				NN19	OM933972	OM934496
				NN2	OM933973	OM934497
				NN20	OM933974	OM934498
				NN21	OM933975	OM934499
				NN22	OM933976	OM934500
				NN23	OM933977	OM934501
				NN24	OM933978	OM934502
				NN25	OM933979	OM934503
				NN26	OM933980	OM934504
				NN27	OM933981	OM934505
				NN28	OM933982	OM934506
				NN29	OM933983	OM934507
				NN3	OM933984	OM934508
				NN30	OM933985	OM934509
				NN31	OM933986	OM934510
				NN4	OM933987	OM934511
				NN5	OM933988	OM934512
				NN6	OM933989	OM934513
				NN7	OM933990	OM934514
				NN8	OM933991	OM934515
				NN9	OM933992	OM934516
Qingyuan (QY)	23.9305	113.273	24	QY1	OM933993	OM934517
				QY10	OM933994	OM934518
				QY11	OM933995	OM934519
				QY12	OM933996	OM934520
				QY13	OM933997	OM934521
				QY14	OM933998	OM934522
				QY15	OM933999	OM934523
				QY16	OM934000	OM934524
				QY17	OM934001	OM934525
				QY18	OM934002	OM934526
				QY19	OM934003	OM934527
				QY2	OM934004	OM934528
				QY20	OM934005	OM934529
				QY21	OM934006	OM934530
				QY22	OM934007	OM934531
				QY23	OM934008	OM934532
				QY24	OM934009	OM934533
				QY3	OM934010	OM934534
				QY4	OM934011	OM934535
				QY5	OM934012	OM934536
				QY6	OM934013	OM934537
				QY7	OM934014	OM934538
				QY8	OM934015	OM934539
				QY9	OM934016	OM934540
QuanZhou (QZ)	25.8453	110.987	27	QZ1	OM934017	OM934541
				QZ10	OM934018	OM934542
				QZ11	OM934019	OM934543
				QZ12	OM934020	OM934544
				QZ13	OM934021	OM934545
				QZ14	OM934022	OM934546
				QZ15	OM934023	OM934547
				QZ16	OM934024	OM934548
				QZ17	OM934025	OM934549
				QZ18	OM934026	OM934550
				QZ19	OM934027	OM934551
				QZ20	OM934028	OM934552
				QZ21	OM934029	OM934553
				QZ22	OM934030	OM934554
				QZ23	OM934031	OM934555
				QZ24	OM934032	OM934556
				QZ25	OM934033	OM934557
				QZ26	OM934034	OM934558
				QZ27	OM934035	OM934559
				QZ28	OM934036	OM934560
				QZ3	OM934037	OM934561
				QZ30	OM934038	OM934562
				QZ4	OM934039	OM934563
				QZ5	OM934040	OM934564
				QZ6	OM934041	OM934565
				QZ7	OM934042	OM934566
				QZ8	OM934043	OM934567
Rongshui (RS)	25.5557	108.744	29	RS1	OM934044	OM934568
				RS10	OM934045	OM934569
				RS11	OM934046	OM934570
				RS12	OM934047	OM934571
				RS13	OM934048	OM934572
				RS14	OM934049	OM934573
				RS15	OM934050	OM934574
				RS16	OM934051	OM934575
				RS17	OM934052	OM934576
				RS18	OM934053	OM934577
				RS19	OM934054	OM934578
				RS2	OM934055	OM934579
				RS20	OM934056	OM934580
				RS21	OM934057	OM934581
				RS22	OM934058	OM934582
				RS23	OM934059	OM934583
				RS24	OM934060	OM934584
				RS25	OM934061	OM934585
				RS26	OM934062	OM934586
				RS27	OM934063	OM934587
				RS28	OM934064	OM934588
				RS29	OM934065	OM934589
				RS3	OM934066	OM934590
				RS4	OM934067	OM934591
				RS5	OM934068	OM934592
				RS6	OM934069	OM934593
				RS7	OM934070	OM934594
				RS8	OM934071	OM934595
				RS9	OM934072	OM934596
Rongshui Jinbiancarp (RSJ)	25.5557	108.744	14	RSJ1	OM934073	OM934597
				RSJ10	OM934074	OM934598
				RSJ11	OM934075	OM934599
				RSJ12	OM934076	OM934600
				RSJ13	OM934077	OM934601
				RSJ14	OM934078	OM934602
				RSJ2	OM934079	OM934603
				RSJ3	OM934080	OM934604
				RSJ4	OM934081	OM934605
				RSJ5	OM934082	OM934606
				RSJ6	OM934083	OM934607
				RSJ7	OM934084	OM934608
				RSJ8	OM934085	OM934609
				RSJ9	OM934086	OM934610
Ruyuan (RY)	24.7754	113.276	65	RY1	OM934087	OM934611
				RY10	OM934088	OM934612
				RY11	OM934089	OM934613
				RY12	OM934090	OM934614
				RY13	OM934091	OM934615
				RY14	OM934092	OM934616
				RY15	OM934093	OM934617
				RY16	OM934094	OM934618
				RY17	OM934095	OM934619
				RY18	OM934096	OM934620
				RY19	OM934097	OM934621
				RY2	OM934098	OM934622
				RY20	OM934099	OM934623
				RY21	OM934100	OM934624
				RY22	OM934101	OM934625
				RY23	OM934102	OM934626
				RY24	OM934103	OM934627
				RY25	OM934104	OM934628
				RY26	OM934105	OM934629
				RY27	OM934106	OM934630
				RY28	OM934107	OM934631
				RY29	OM934108	OM934632
				RY3	OM934109	OM934633
				RY30	OM934110	OM934634
				RY31	OM934111	OM934635
				RY32	OM934112	OM934636
				RY33	OM934113	OM934637
				RY34	OM934114	OM934638
				RY35	OM934115	OM934639
				RY36	OM934116	OM934640
				RY37	OM934117	OM934641
				RY38	OM934118	OM934642
				RY39	OM934119	OM934643
				RY4	OM934120	OM934644
				RY40	OM934121	OM934645
				RY41	OM934122	OM934646
				RY42	OM934123	OM934647
				RY43	OM934124	OM934648
				RY44	OM934125	OM934649
				RY45	OM934126	OM934650
				RY46	OM934127	OM934651
				RY5	OM934128	OM934652
				RY6	OM934129	OM934653
				RY7	OM934130	OM934654
				RY8	OM934131	OM934655
				RY9	OM934132	OM934656
				RY91	OM934133	OM934657
				RY910	OM934134	OM934658
				RY911	OM934135	OM934659
				RY912	OM934136	OM934660
				RY913	OM934137	OM934661
				RY914	OM934138	OM934662
				RY915	OM934139	OM934663
				RY916	OM934140	OM934664
				RY917	OM934141	OM934665
				RY918	OM934142	OM934666
				RY919	OM934143	OM934667
				RY92	OM934144	OM934668
				RY920	OM934145	OM934669
				RY921	OM934146	OM934670
				RY922	OM934147	OM934671
				RY95	OM934148	OM934672
				RY96	OM934149	OM934673
				RY97	OM934150	OM934674
				RY98	OM934151	OM934675
Sanjiang (SJ)	25.7801	109.597	30	SJ1	OM934152	OM934676
				SJ10	OM934153	OM934677
				SJ11	OM934154	OM934678
				SJ12	OM934155	OM934679
				SJ13	OM934156	OM934680
				SJ14	OM934157	OM934681
				SJ15	OM934158	OM934682
				SJ16	OM934159	OM934683
				SJ17	OM934160	OM934684
				SJ18	OM934161	OM934685
				SJ19	OM934162	OM934686
				SJ2	OM934163	OM934687
				SJ20	OM934164	OM934688
				SJ21	OM934165	OM934689
				SJ22	OM934166	OM934690
				SJ23	OM934167	OM934691
				SJ24	OM934168	OM934692
				SJ25	OM934169	OM934693
				SJ26	OM934170	OM934694
				SJ27	OM934171	OM934695
				SJ28	OM934172	OM934696
				SJ29	OM934173	OM934697
				SJ3	OM934174	OM934698
				SJ30	OM934175	OM934699
				SJ4	OM934176	OM934700
				SJ5	OM934177	OM934701
				SJ6	OM934178	OM934702
				SJ7	OM934179	OM934703
				SJ8	OM934180	OM934704
				SJ9	OM934181	OM934705
Shaijiang (SJL)	25.7593	109.387	42	SJL1	OM934182	OM934706
				SJL10	OM934183	OM934707
				SJL11	OM934184	OM934708
				SJL12	OM934185	OM934709
				SJL13	OM934186	OM934710
				SJL14	OM934187	OM934711
				SJL15	OM934188	OM934712
				SJL16	OM934189	OM934713
				SJL17	OM934190	OM934714
				SJL18	OM934191	OM934715
				SJL19	OM934192	OM934716
				SJL2	OM934193	OM934717
				SJL20	OM934194	OM934718
				SJL21	OM934195	OM934719
				SJL22	OM934196	OM934720
				SJL23	OM934197	OM934721
				SJL24	OM934198	OM934722
				SJL25	OM934199	OM934723
				SJL26	OM934200	OM934724
				SJL27	OM934201	OM934725
				SJL28	OM934202	OM934726
				SJL29	OM934203	OM934727
				SJL3	OM934204	OM934728
				SJL30	OM934205	OM934729
				SJL31	OM934206	OM934730
				SJL32	OM934207	OM934731
				SJL33	OM934208	OM934732
				SJL34	OM934209	OM934733
				SJL35	OM934210	OM934734
				SJL36	OM934211	OM934735
				SJL37	OM934212	OM934736
				SJL38	OM934213	OM934737
				SJL39	OM934214	OM934738
				SJL4	OM934215	OM934739
				SJL40	OM934216	OM934740
				SJL41	OM934217	OM934741
				SJL42	OM934218	OM934742
				SJL5	OM934219	OM934743
				SJL6	OM934220	OM934744
				SJL7	OM934221	OM934745
				SJL8	OM934222	OM934746
				SJL9	OM934223	OM934747
Xiaorong (XR)	25.093	109.201	20	XR1	OM934224	OM934748
				XR10	OM934225	OM934749
				XR11	OM934226	OM934750
				XR12	OM934227	OM934751
				XR13	OM934228	OM934752
				XR14	OM934229	OM934753
				XR15	OM934230	OM934754
				XR16	OM934231	OM934755
				XR17	OM934232	OM934756
				XR18	OM934233	OM934757
				XR19	OM934234	OM934758
				XR2	OM934235	OM934759
				XR20	OM934236	OM934760
				XR3	OM934237	OM934761
				XR4	OM934238	OM934762
				XR5	OM934239	OM934763
				XR6	OM934240	OM934764
				XR7	OM934241	OM934765
				XR8	OM934242	OM934766
				XR9	OM934243	OM934767
Yizhou (YZ)	24.4988	108.627	9	YZ1	OM934244	OM934768
				YZ2	OM934245	OM934769
				YZ3	OM934246	OM934770
				YZ4	OM934247	OM934771
				YZ5	OM934248	OM934772
				YZ6	OM934249	OM934773
				YZ7	OM934250	OM934774
				YZ8	OM934251	OM934775
				YZ9	OM934252	OM934776
