# Supplementary material for: Genetic sources and diversity of the paddy field carp in the Pearl River basin inferred from two mitochondrial loci
Source: Frontiers journal article supplement (doi:10.3389/fevo.2022.896609), 2022-07-28
Supplement: Table_2.XLSX [file Table_2.XLSX]

## Sheet: Sheet1
Table S2. The frequency and distribution of each haplotype
Haplotype:	CR	CC	CH	DTL	JBL	RY	SJL	WL
Hap_1	0.167	0	0	0	0	0	0	0
Hap_2	0.167	0	0	0	0	0	0	0
Hap_3	0.167	0	0	0	0	0	0	0
Hap_4	0.167	0	0	0	0	0	0	0
Hap_5	0.167	0	0	0	0	0	0	0
Hap_6	0.167	0	0	0	0	0	0	0
Hap_7	0	0.25	0	0	0	0	0	0
Hap_8	0	0.25	0	0	0	0	0	0
Hap_9	0	0.25	0	0	0	0	0	0
Hap_10	0	0.25	0	0	0	0	0	0
Hap_11	0	0	0.1	0	0	0	0	0
Hap_12	0	0	0.6	0.0124	0.0156	0	0.0238	0.0208
Hap_13	0	0	0.1	0.00621	0.0156	0	0	0
Hap_14	0	0	0.1	0	0	0	0	0
Hap_15	0	0	0.1	0	0	0	0	0
Hap_16	0	0	0	0.00621	0	0	0	0
Hap_17	0	0	0	0.0186	0	0	0	0
Hap_18	0	0	0	0.0124	0.0625	0	0	0
Hap_19	0	0	0	0.0311	0.0312	0	0.476	0
Hap_20	0	0	0	0.00621	0	0	0	0
Hap_21	0	0	0	0.174	0.0625	0	0.19	0
Hap_22	0	0	0	0.00621	0	0	0	0
Hap_23	0	0	0	0.0124	0.156	0	0	0.0521
Hap_24	0	0	0	0.0248	0	0	0	0.0365
Hap_25	0	0	0	0.00621	0.141	0	0	0.00521
Hap_26	0	0	0	0.00621	0	0	0	0
Hap_27	0	0	0	0.00621	0	0	0	0
Hap_28	0	0	0	0.0124	0	0	0	0.0417
Hap_29	0	0	0	0.00621	0	0	0	0
Hap_30	0	0	0	0.0124	0	0	0	0.0365
Hap_31	0	0	0	0.0683	0.0781	0	0	0.115
Hap_32	0	0	0	0.00621	0	0	0	0.0104
Hap_33	0	0	0	0.0373	0	0	0	0.0677
Hap_34	0	0	0	0.0124	0	0	0	0.0156
Hap_35	0	0	0	0.00621	0	0	0	0.026
Hap_36	0	0	0	0.00621	0	0	0	0
Hap_37	0	0	0	0.0186	0	0	0	0.0573
Hap_38	0	0	0	0.00621	0	0	0	0.0781
Hap_39	0	0	0	0.00621	0	0	0	0.0625
Hap_40	0	0	0	0.155	0.0625	0	0.0714	0
Hap_41	0	0	0	0.0745	0	0	0.143	0
Hap_42	0	0	0	0.0124	0.0781	0	0	0
Hap_43	0	0	0	0.00621	0	0	0	0
Hap_44	0	0	0	0.0248	0	0	0	0
Hap_45	0	0	0	0.0248	0	0	0	0
Hap_46	0	0	0	0.0186	0	0	0	0
Hap_47	0	0	0	0.00621	0	0	0	0
Hap_48	0	0	0	0.00621	0	0	0	0
Hap_49	0	0	0	0.0186	0	0	0	0
Hap_50	0	0	0	0.0311	0	0	0	0
Hap_51	0	0	0	0.00621	0	0	0	0
Hap_52	0	0	0	0.00621	0	0	0	0
Hap_53	0	0	0	0.00621	0	0	0	0
Hap_54	0	0	0	0.00621	0	0	0	0.0104
Hap_55	0	0	0	0.00621	0	0	0	0
Hap_56	0	0	0	0.00621	0.0312	0	0.0476	0
Hap_57	0	0	0	0.00621	0	0	0	0
Hap_58	0	0	0	0.0124	0.0625	0	0	0
Hap_59	0	0	0	0.0124	0	0	0	0
Hap_60	0	0	0	0.0124	0	0	0	0
Hap_61	0	0	0	0.00621	0	0	0	0
Hap_62	0	0	0	0.00621	0	0	0	0
Hap_63	0	0	0	0	0.0625	0	0	0
Hap_64	0	0	0	0	0.0156	0	0	0
Hap_65	0	0	0	0	0.0156	0	0	0
Hap_66	0	0	0	0	0.0781	0	0	0.0104
Hap_67	0	0	0	0	0.0156	0	0	0.026
Hap_68	0	0	0	0	0.0156	0	0	0.00521
Hap_69	0	0	0	0	0	0.0154	0	0
Hap_70	0	0	0	0	0	0.0462	0	0
Hap_71	0	0	0	0	0	0.569	0	0
Hap_72	0	0	0	0	0	0.0462	0	0
Hap_73	0	0	0	0	0	0.0154	0	0
Hap_74	0	0	0	0	0	0.0154	0	0
Hap_75	0	0	0	0	0	0.292	0	0.0469
Hap_76	0	0	0	0	0	0	0.0238	0
Hap_77	0	0	0	0	0	0	0.0238	0
Hap_78	0	0	0	0	0	0	0	0.0208
Hap_79	0	0	0	0	0	0	0	0.0104
Hap_80	0	0	0	0	0	0	0	0.00521
Hap_81	0	0	0	0	0	0	0	0.00521
Hap_82	0	0	0	0	0	0	0	0.0312
Hap_83	0	0	0	0	0	0	0	0.00521
Hap_84	0	0	0	0	0	0	0	0.00521
Hap_85	0	0	0	0	0	0	0	0.0625
Hap_86	0	0	0	0	0	0	0	0.00521
Hap_87	0	0	0	0	0	0	0	0.00521
Hap_88	0	0	0	0	0	0	0	0.0156
Hap_89	0	0	0	0	0	0	0	0.0104
Hap_90	0	0	0	0	0	0	0	0.00521
Hap_91	0	0	0	0	0	0	0	0.00521
Hap_92	0	0	0	0	0	0	0	0.00521
Hap_93	0	0	0	0	0	0	0	0.00521
Hap_94	0	0	0	0	0	0	0	0.00521
Hap_95	0	0	0	0	0	0	0	0.00521
Hap_96	0	0	0	0	0	0	0	0.00521
Hap_97	0	0	0	0	0	0	0	0.00521
Hap_98	0	0	0	0	0	0	0	0.00521
Hap_99	0	0	0	0	0	0	0	0.00521
Hap_100	0	0	0	0	0	0	0	0.00521
Hap_101	0	0	0	0	0	0	0	0.00521
Hap_102	0	0	0	0	0	0	0	0.00521
Hap_103	0	0	0	0	0	0	0	0.00521
Hap_104	0	0	0	0	0	0	0	0.0104
Hap_105	0	0	0	0	0	0	0	0.00521
Hap_106	0	0	0	0	0	0	0	0.00521
