# Supplementary material for: Genetic sources and diversity of the paddy field carp in the Pearl River basin inferred from two mitochondrial loci
Source: Frontiers journal article supplement (doi:10.3389/fevo.2022.896609), 2022-07-28
Supplement: Table_3.XLSX [file Table_3.XLSX]

## Sheet: Sheet1
Table S3. Population pairwise Fst (below diagonal) and significance probability estimates (above diagonal) within DTL
	CJ	GG	HJ	LN	RS
CJ	0	***	***	***	***
GG	0.07182	0	***	***	***
HJ	0.18752	0.24699	0	***	***
LN	0.10719	0.18148	0.32433	0	***
RS	0.2647	0.23517	0.25398	0.35878	0
*** represents P<0.001
