# Supplementary material for: Genetic sources and diversity of the paddy field carp in the Pearl River basin inferred from two mitochondrial loci
Source: Frontiers journal article supplement (doi:10.3389/fevo.2022.896609), 2022-07-28
Supplement: Table_4.XLSX [file Table_4.XLSX]

## Sheet: Sheet1
Table S4. Population pairwise Fst (below diagonal) and significance probability estimates (above diagonal) within JBL
	SJ		XR
SJ	0	***	***
RSJ	0.28214	0	***
XR	0.26969	0.21659	0
*** represents P<0.001
