# Supplementary material for: Genetic sources and diversity of the paddy field carp in the Pearl River basin inferred from two mitochondrial loci
Source: Frontiers journal article supplement (doi:10.3389/fevo.2022.896609), 2022-07-28
Supplement: Table_5.XLSX [file Table_5.XLSX]

## Sheet: Sheet1
Table S5. Population pairwise Fst (below diagonal) and significance probability estimates (above diagonal) within Wu carp
	DA	FS	GL	LC	NN	QY	QZ	YZ
DA	0	–	–	–	**	–	–	**
FS	0.02744	0	–	–	–	–	**	–
GL	-0.01218	-0.00623	0	–	–	–	–	–
LC	0.00915	-0.0058	-0.01135	0	–	–	**	–
NN	0.07532	0.00612	0.03335	0.00942	0	–	***	–
QY	0.03963	-0.00588	0.01031	-0.00637	-0.01933	0	**	–
QZ	0.00344	0.07526	0.01725	0.05115	0.12922	0.08751	0	**
YZ	0.11517	-0.01168	0.03284	0.01218	-0.04175	-0.04174	0.17554	0
– represents not significant. ** represents P<0.01. *** represents P<0.001
